# Supplementary material
Source: PubMed Central journal article supplement (PMC8608285)

250  
150  
100  
75  
50  
37  
25  
10

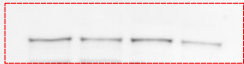

MTR, 140 kDa

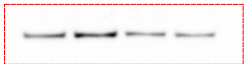

actin, 42 kDa

Supplement: NIHMS1749467-supplement-1749467_SD_ED_unprocessed_immunoblots_exfig1m.pdf [file NIHMS1749467-supplement-1749467_SD_ED_unprocessed_immunoblots_exfig1m.pdf]

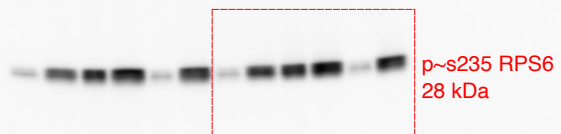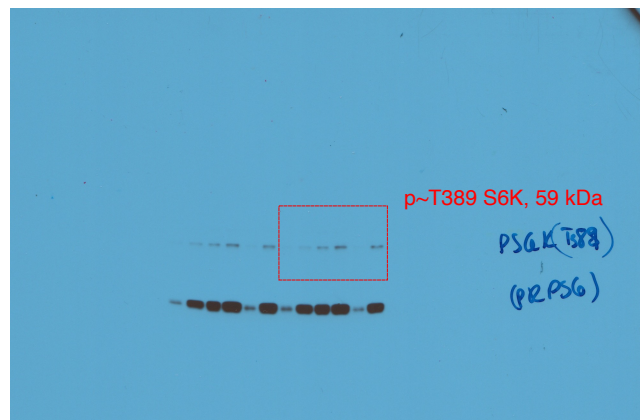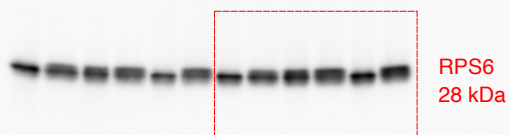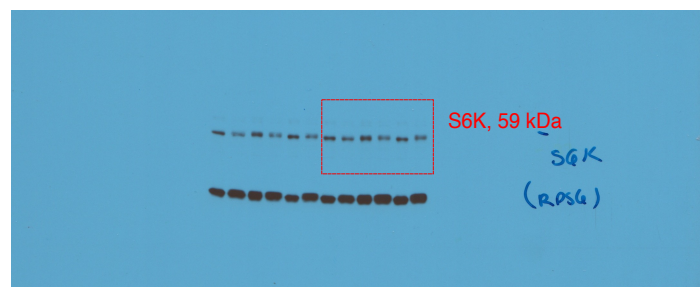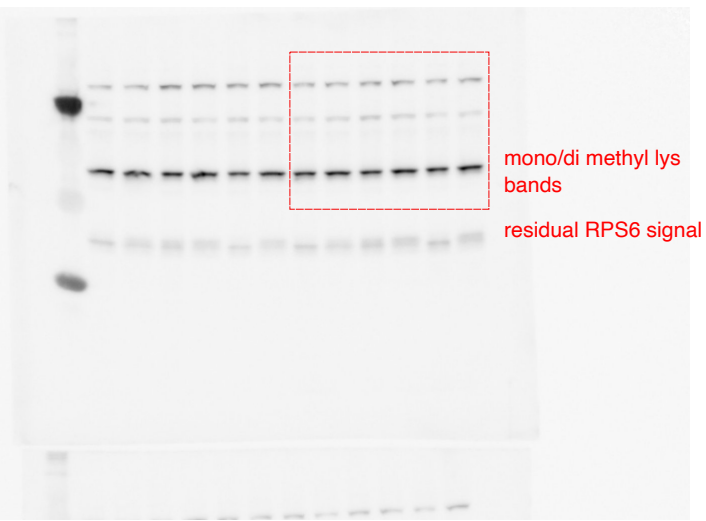

Supplement: NIHMS1749467-supplement-1749467_SD_ED_unprocessed_immunoblots_exfig4e.pdf [file NIHMS1749467-supplement-1749467_SD_ED_unprocessed_immunoblots_exfig4e.pdf]

(flipped horizontally for figure)

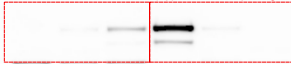

MTR, 140 kDa

(flipped horizontally for figure)

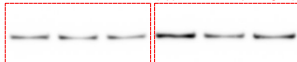

actin, 42 kDa

Supplement: NIHMS1749467-supplement-1749467_SD_unprocessed_immunoblots_fig2a.pdf [file NIHMS1749467-supplement-1749467_SD_unprocessed_immunoblots_fig2a.pdf]

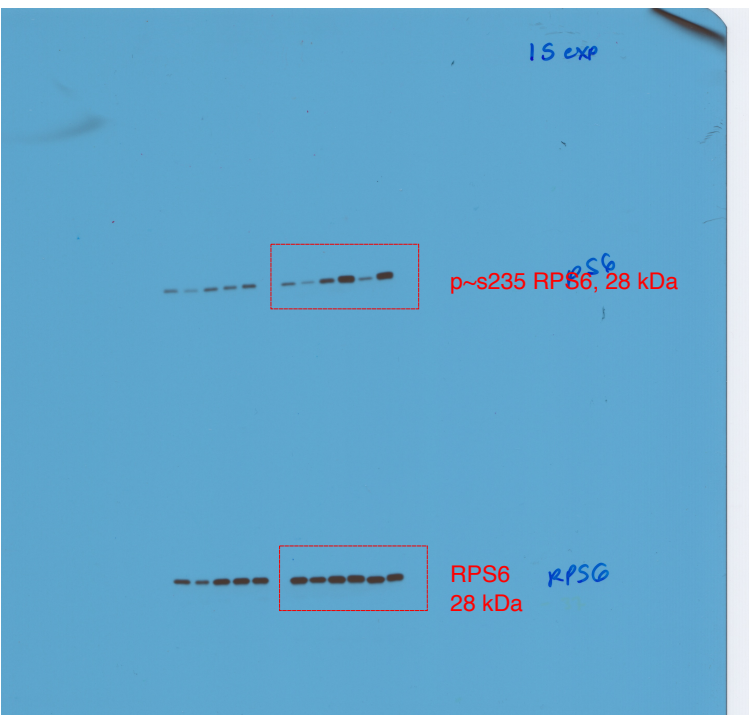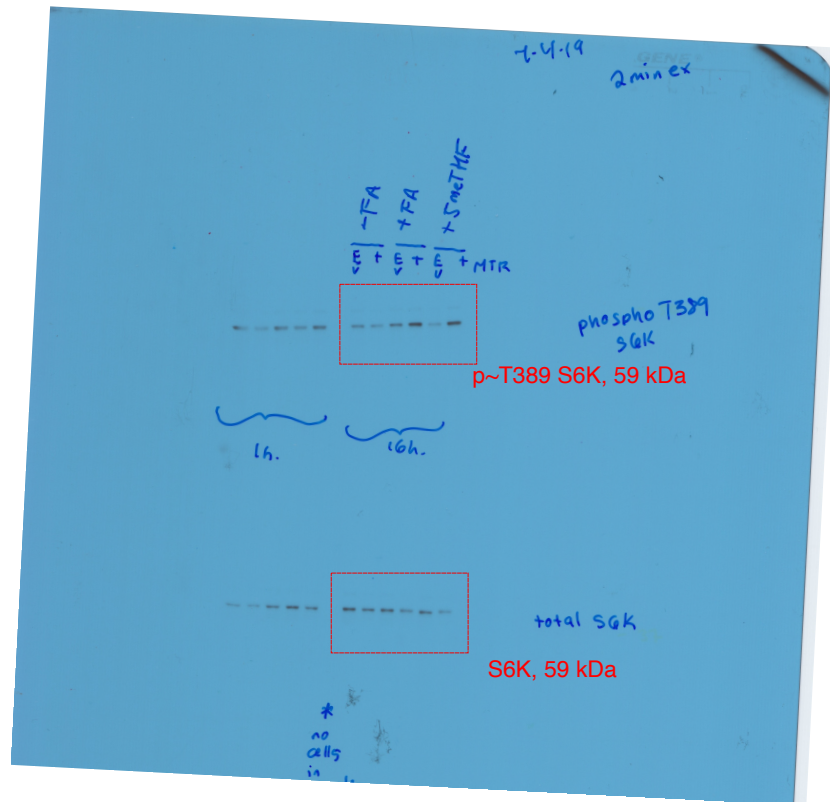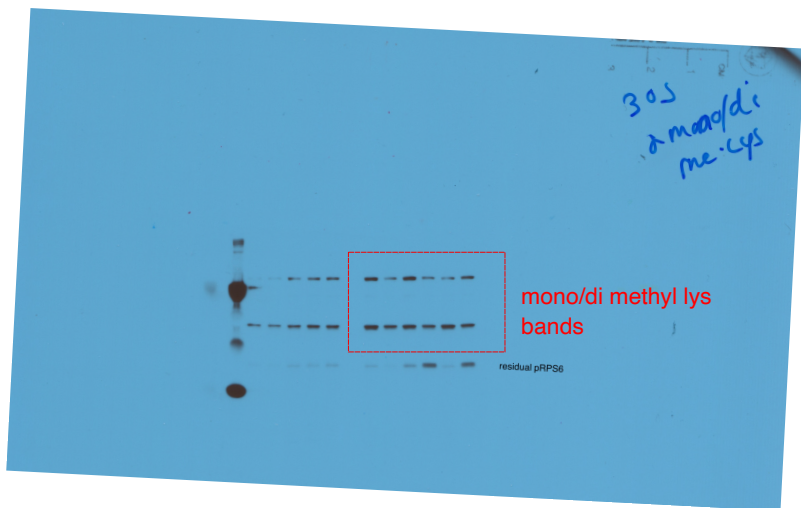

Supplement: NIHMS1749467-supplement-1749467_SD_unprocessed_immunoblots_fig4d.pdf [file NIHMS1749467-supplement-1749467_SD_unprocessed_immunoblots_fig4d.pdf]
